# Supplementary material
Source: Springer Nature journal article supplement (https://www.springermedizin.de/resource/supplementary/12916_2013_761_MOESM1_ESM.pdf/9598262)

Fetus/infant

Child

Adolescent/adult

**Autism**

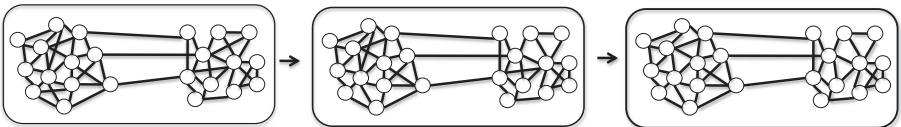

**Typical development**

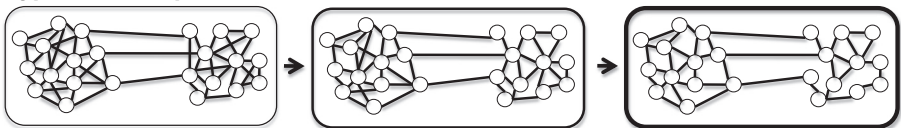

**Schizophrenia**

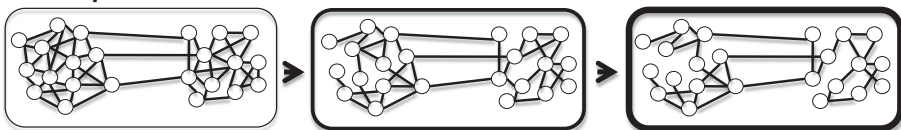

Supplement: MOESM1 [file 9598262]
